# Supplementary material
Source: Elsevier journal article supplement (https://authors.library.caltech.edu/71349/9/mmc8.xlsx)
Supplement: mmc8 [file mmc8.xlsx]

## Sheet: Sheet1
Tal1	1	2	2	4	5
Dmbx1	5	1	5	3	3
Emx2	2	3	4	4	3
Uncx	2	3	1	1	4
Paxip1	4	1	2	1	2
Ctnnb1	5	2	3	3	4
Prdm1	5	4	5	1	2
Rybp	4	2	1	2	1
Nfkb2	2	1	3	5	5
Tfdp2	5	2	3	1	1
Grhl1	4	1	1	5	4
Sp8	5	5	1	2	4
Irf2	4	5	4	1	1
Zfp287	3	2	4	1	3
Esr2	3	1	2	5	2
Zfp128	5	2	1	3	1
Vav1	5	3	3	5	1
Sp1	2	4	4	1	5
Ppargc1b	2	4	1	3	1
Sp7	2	3	5	2	4
Pin1	1	2	3	5	3
Nfya	5	4	1	2	5
Vsx1	3	3	2	1	4
Klf1	4	2	3	5	1
Vsx2	5	4	2	4	2
Mybl1	4	5	3	1	2
Mybl2	3	4	4	2	5
Rnf2	3	5	1	4	5
Blzf1	4	3	2	1	5
Topors	2	4	1	5	4
Nr3c2	3	4	2	5	4
Nfia	3	4	1	3	2
Taf6l	1	4	1	5	3
Nr4a3	5	2	1	5	4
Hoxd12	5	3	3	4	2
Hoxd13	1	4	3	1	5
Ttf1	2	4	3	4	3
Sox9	3	3	4	1	2
Nr2e1	3	4	1	4	1
Polr2b	4	3	3	4	1
Hltf	1	3	1	5	4
Sox6	4	1	1	2	2
Pbx3	3	5	2	1	2
Sox5	3	2	3	1	4
Foxa1	1	1	3	4	5
Cdc5l	4	1	4	5	1
Cebpg	1	2	1	2	3
Ciita	1	4	3	4	2
Rest	5	4	1	4	3
Ets1	3	1	2	4	3
Mafk	4	3	1	3	4
Tbx15	1	3	2	1	2
Scml2	3	4	4	5	2
Myb	5	1	3	3	5
Clock	5	4	2	5	1
Rbpj	5	2	5	2	3
Foxc1	3	5	3	2	5
Zfp422	1	2	4	4	3
Pias3	3	2	4	5	4
Runx1	5	1	4	2	5
Ppara	5	3	4	2	3
Relb	5	5	3	2	2
Vdr	2	5	4	1	4
Cdc6	4	5	5	4	2
Arid3a	3	3	1	2	4
Lhx1	5	3	5	3	1
Hoxb8	4	1	5	2	3
Hoxb9	1	2	4	3	4
Hic1	1	4	2	2	5
Lhx6	1	4	4	3	2
Six4	3	1	2	3	4
Hoxb3	2	4	3	3	4
Zfp263	2	5	3	1	5
Cbfa2t3	2	4	1	1	3
Ehf	4	4	1	3	3
Nhlh1	5	3	2	4	3
Gata6	4	2	3	1	5
Gata4	3	3	1	1	5
Gata5	1	4	5	1	3
Lpp	4	5	3	2	1
Nfe2l3	2	1	3	3	2
Nfe2l2	1	5	3	3	2
Tmf1	4	4	1	5	1
Gli1	5	3	4	4	1
Tbx2	3	3	5	1	1
En1	5	4	2	3	3
En2	1	1	5	3	4
Hnf1a	2	3	1	5	5
Tbx4	5	3	1	4	4
Zfp423	2	1	5	2	1
Elf1	3	1	4	5	5
Foxb1	4	1	3	5	2
Elf2	2	4	5	4	1
Elf4	1	3	4	4	2
Mxd1	1	2	5	1	5
Wt1	1	3	5	4	1
Rfx4	5	1	3	2	1
Bhlhe41	3	1	4	4	1
Sox13	1	5	4	1	3
Taf4b	5	1	2	3	1
Rfx2	1	2	3	4	4
Sox17	4	4	1	1	5
Ahr	4	1	2	5	3
Sall4	3	4	2	4	5
Med14	1	2	4	5	2
Smyd1	2	3	4	5	2
Sall3	4	5	1	2	3
Arid2	3	5	1	5	4
Zfp64	1	4	2	4	3
Pgr	2	1	4	3	1
Trps1	3	4	3	1	2
Hoxa1	3	2	5	5	3
Bach2	4	3	4	1	3
Bach1	5	2	5	4	1
Notch3	5	1	1	2	3
Pknox1	1	5	5	4	4
Pknox2	2	3	4	1	1
Sin3a	2	1	1	3	4
Etv3	4	5	1	4	1
Smad9	4	2	3	4	2
Smad5	3	1	1	4	4
Alx1	2	2	1	3	3
Egf	3	1	3	4	2
Mn1	1	5	1	5	2
Nkx3-1	3	3	5	5	2
Rbak	1	2	2	3	1
Gabpa	2	1	3	4	1
Nfkbiz	3	4	4	1	1
Zscan21	4	2	2	3	4
Trp73	1	4	2	3	4
E2f7	1	3	1	2	2
Esrrg	1	5	2	2	4
Rbpjl	4	2	1	1	2
Nfatc4	5	1	5	2	4
Nr5a1	4	3	1	5	2
Neurod4	5	5	4	2	1
Esrrb	3	4	5	5	1
Tbx21	5	1	2	5	4
Rorc	1	4	3	5	1
Mitf	5	4	4	1	3
Pax7	3	2	4	3	1
Pax6	4	2	5	1	3
Pax1	3	5	5	4	1
Pax3	1	4	3	2	4
Pax2	2	3	2	5	4
Pax9	4	2	2	4	3
Zkscan17	5	3	2	3	4
Gfi1	4	5	2	5	4
Mzf1	1	2	4	2	5
Runx3	4	1	5	3	2
Smarca4	4	5	3	5	3
Foxd4	1	3	3	2	5
Foxd3	1	1	4	5	3
Creb1	3	5	2	2	1
Srebf1	2	3	5	5	1
Sox11	1	2	5	4	2
Gmeb2	1	3	4	5	1
Irx4	1	2	5	5	1
Pou3f2	2	2	5	1	1
Ikzf1	5	3	2	1	1
Tcf23	5	3	1	3	5
Mtf2	1	5	4	3	1
Npas3	3	4	1	1	4
Nfatc3	2	2	1	5	1
Nfil3	3	2	5	1	2
Phox2b	2	3	4	2	5
Plag1	2	3	1	2	3
E2f2	2	3	2	3	1
Ddx3x	2	2	5	4	3
Taf2	2	3	5	4	2
Pou4f1	1	1	3	2	2
Trim33	1	3	2	3	5
Tsc2	2	5	1	2	1
Lmx1a	5	1	4	5	2
Nr2f2	5	4	3	4	1
Eomes	4	4	3	2	2
Wwtr1	5	5	2	4	1
Foxo1	3	5	2	5	3
Ar	2	1	3	1	4
Zfp354a	5	2	3	4	3
Elk4	3	4	1	2	3
Foxo4	3	5	1	2	2
Sall1	5	3	1	5	3
Mycn	5	1	2	1	3
Maml3	3	2	1	2	5
Foxp3	2	1	5	4	4
Atm	4	2	5	5	4
Uaca	5	4	4	3	1
Tbr1	1	3	1	4	5
Pml	1	4	4	5	5
Lhx3	3	1	5	4	5
Atr	1	3	4	1	5
Zbtb33	2	5	5	1	3
Ptch1	2	4	2	5	3
Lhx5	5	2	5	3	2
Barhl1	2	4	1	4	5
Irx5	2	3	2	4	5
Tfap2b	5	4	1	3	4
Tfap2e	1	2	1	3	2
Rxra	5	3	2	2	5
Rxrb	1	3	2	4	4
Gli2	3	3	4	2	1
Gli3	4	2	4	2	3
Zic4	4	5	4	2	5
Zic5	3	5	5	2	3
Zic2	5	2	1	4	5
Zic3	2	5	4	3	2
Satb1	4	5	1	1	4
Onecut2	3	2	1	3	4
Foxn4	4	5	5	3	3
Mnat1	5	5	2	3	2
Foxn1	2	4	3	2	5
Dlx2	3	1	5	5	4
Vezf1	3	4	5	2	4
sncg						1
sst						2
th						3
vip						4
xdh						5
slc17a8							1
slc5a7							2
slc6a3							3
slc6a8							4
smad3							5
opalin								1
pdgfra								2
palvb								3
reln								4
slc17a7								5
lyve									1
mfge8									2
mog									3
myl14									4
ndnf									5
ctss										1
foxj1										2
gad1										3
htr3a										4
igtp										5
acta2											1
alldh1l1											2
camk2											3
chat											4
cldn5											5
ngef												1
tiam1												2
slc1a2												3
gja1												4
fbll1												5
Smarca4													1
Sin3a													2
Npas3													3
Neurod4													4
